# Supplementary material for: Two single-point mutations in Ankyrin Repeat one drastically change the threshold temperature of TRPV1
Source: PubMed Central journal article supplement (PMC10175561; doi:10.1038/s41467-023-38051-1), 2023-05-11
Supplement: 41467_2023_38051_MOESM1_ESM.pdf [file 41467_2023_38051_MOESM1_ESM.pdf]

# Supplementary Fig1

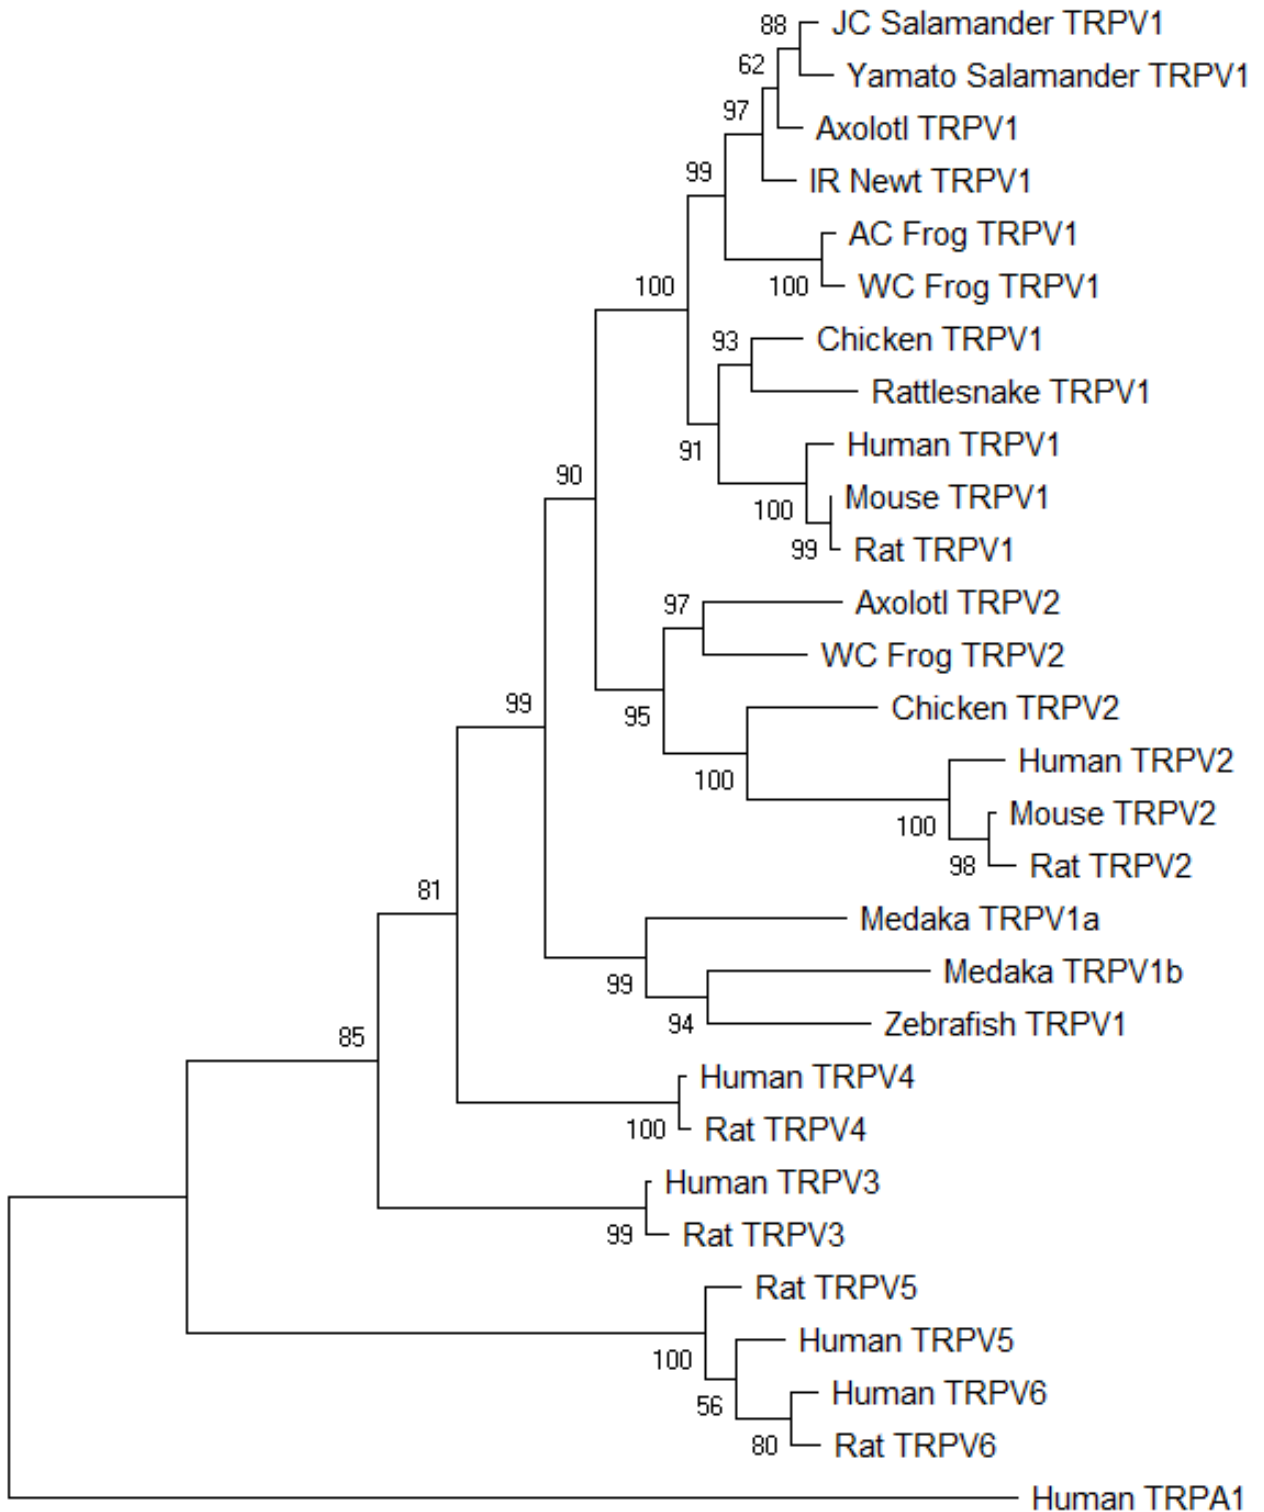

0.50

# Supplementary Fig2

**Axolotl**

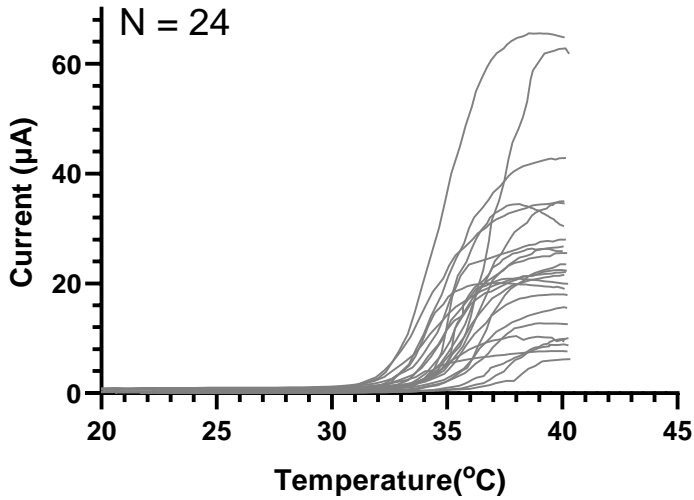

**IR Newt**

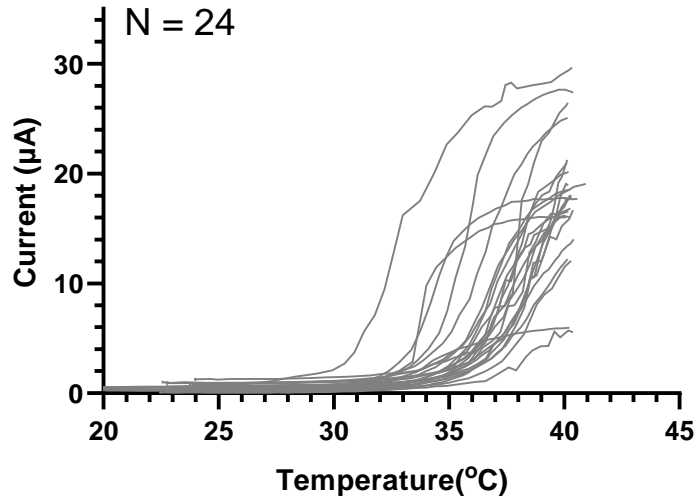

**JC Sal**

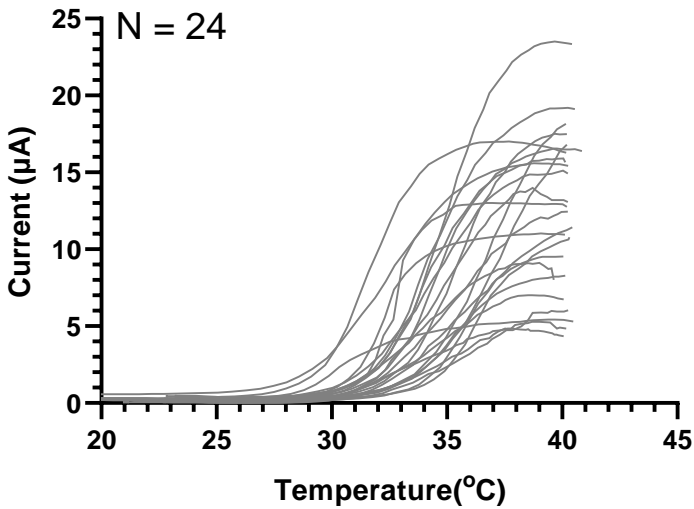

**Y Sal**

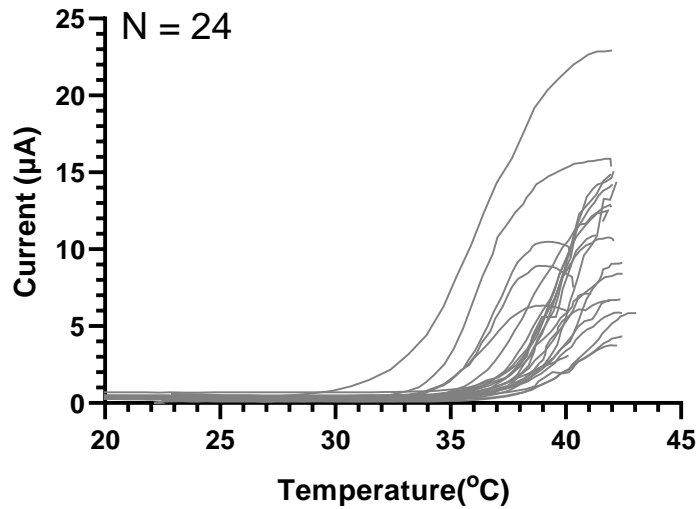

**Rat**

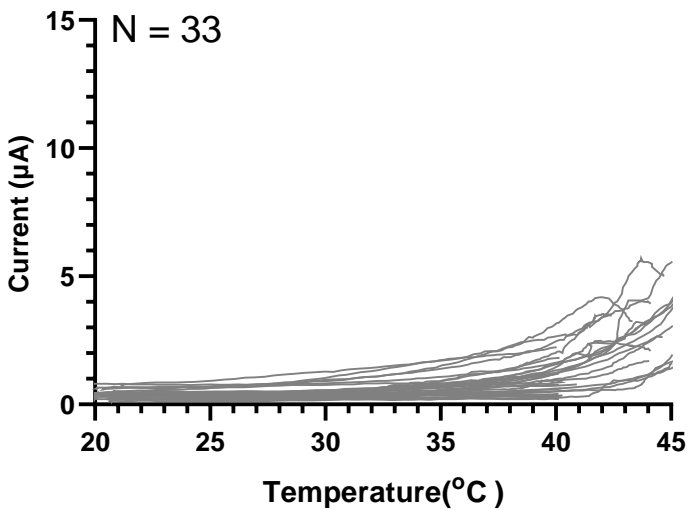

**Uninjection**

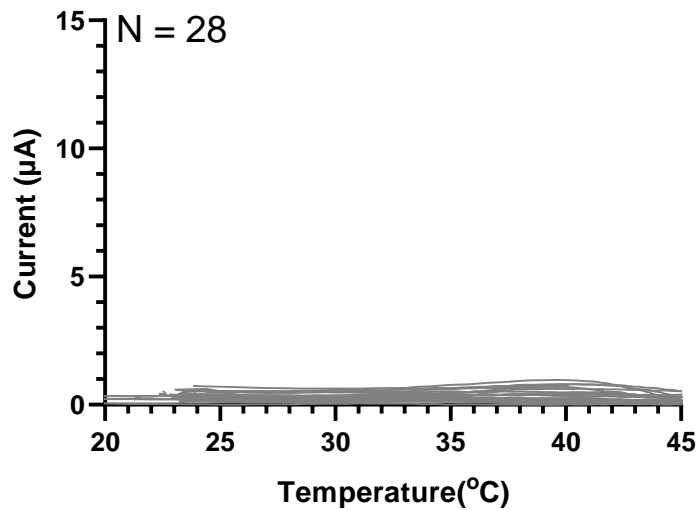

# Supplementary Fig3

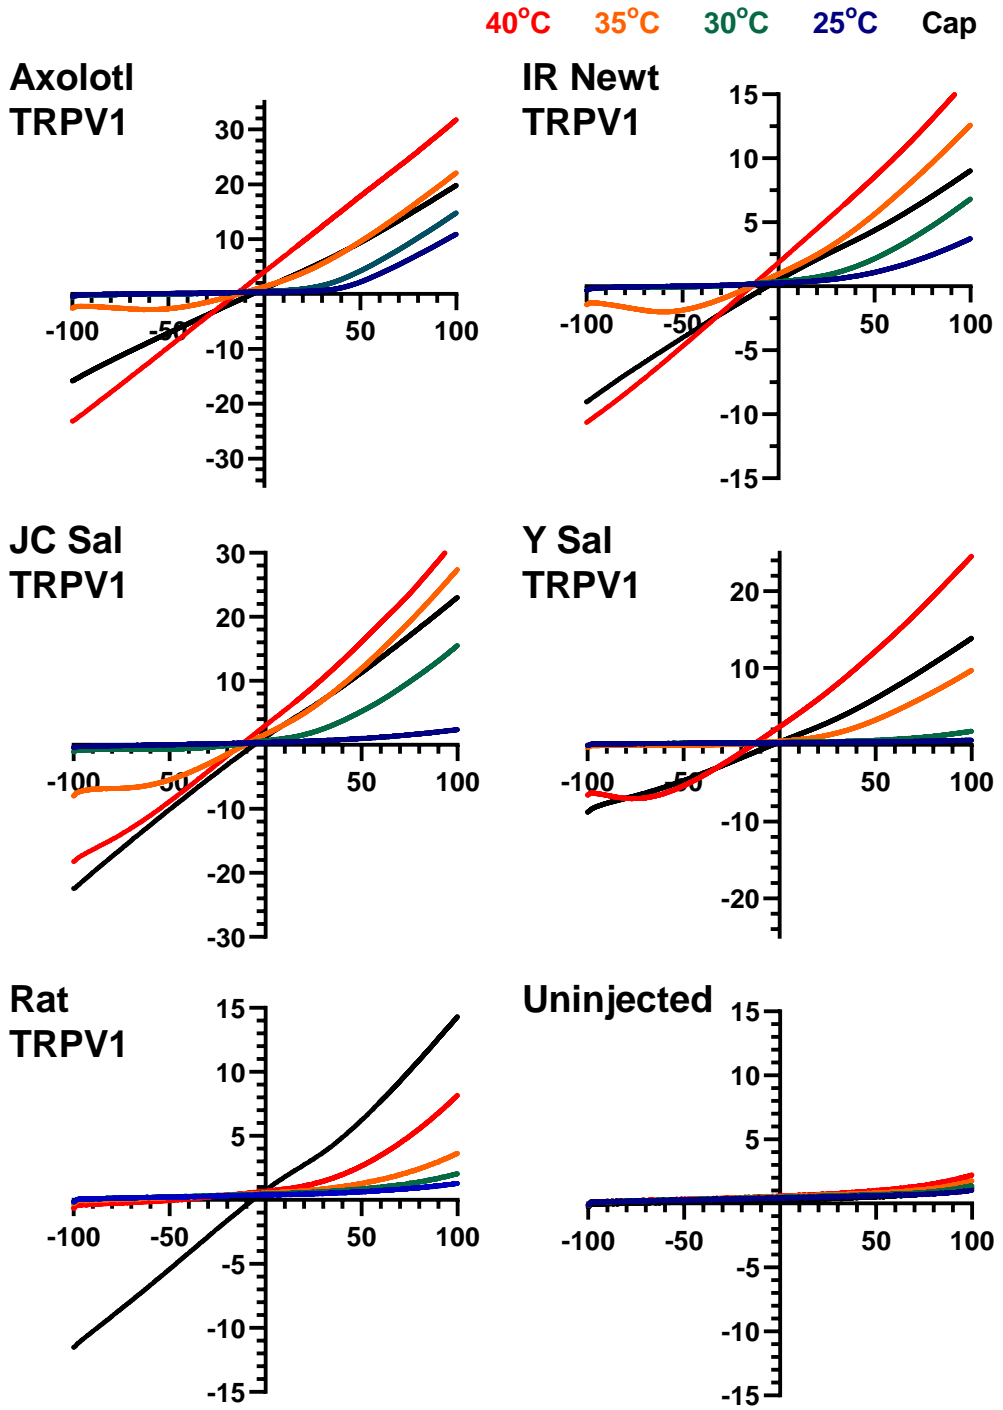

# Supplementary Fig4

| S124 |       | Q188 |       |
|------|-------|------|-------|
| K    | -0.97 | E    | -1.55 |
| G    | -0.95 | P    | -0.97 |
| R    | -0.39 | M    | -0.52 |
| N    | -0.39 | K    | -0.41 |
| H    | -0.31 | F    | -0.38 |
| F    | -0.22 | Y    | -0.34 |
| Q    | -0.22 | L    | -0.34 |
| C    | -0.09 | V    | -0.25 |
| S    | 0.00  | W    | -0.23 |
| L    | 0.04  | I    | -0.19 |
| Y    | 0.06  | C    | -0.17 |
| M    | 0.14  | T    | -0.15 |
| A    | 0.15  | D    | -0.13 |
| W    | 0.24  | R    | -0.08 |
| D    | 0.34  | A    | -0.02 |
| E    | 0.36  | Q    | 0.00  |
| T    | 0.75  | S    | 0.08  |
| V    | 1.36  | H    | 0.13  |
| I    | 2.62  | G    | 0.13  |
| P    | 5.59  | N    | 0.20  |

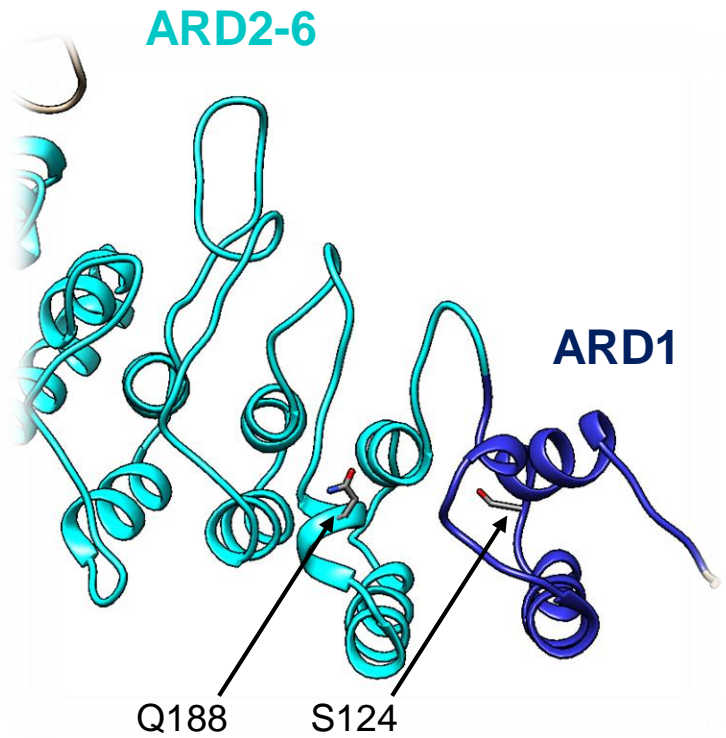

## Supplementary Figure Legends

### Supplementary Figure 1. Phylogenetic tree of TRPV1-6

Amino acid sequences of ANK1-TRPbox of TRPV1s from tailed amphibians, mammals, birds, reptiles, frogs, and fish, TRPV2s-6s from mammals, and human TRPA1 were used for a maximum likelihood analysis.

### Supplementary Figure 2. Heat response of TRPV1 from four urodelans and rat

Urodelan or rat TRPV1 was expressed in *Xenopus* oocytes and the heat-induced response was examined by the two-electrode voltage clamp method. Heat responses at  $-80\text{mV}$  for the individual oocytes expressing each TRPV1 are indicated.

### Supplementary Figure 3. I-V relationship for heat response of tailed amphibian TRPV1

Urodelan or rat TRPV1 was expressed in *Xenopus* oocytes. The capsaicin- or heat-induced response was examined by the two-electrode voltage clamp method. The I–V relationship for the heat response at the indicated temperature and for the capsaicin-response (urodelans:  $50\ \mu\text{M}$ , rat:  $4\ \mu\text{M}$ ) are shown.

### Supplementary Figure 4. The mutational folding energy changes at 124S and 188Q of rat TRPV1

Based on homology modeling of rTRPV1 described in Fig. 9, the mutational folding energy changes ( $\Delta\Delta G$ ) at 124S and 188Q were evaluated with FoldX. The positions of 124S and 188Q in the structure of the N-terminus are shown.

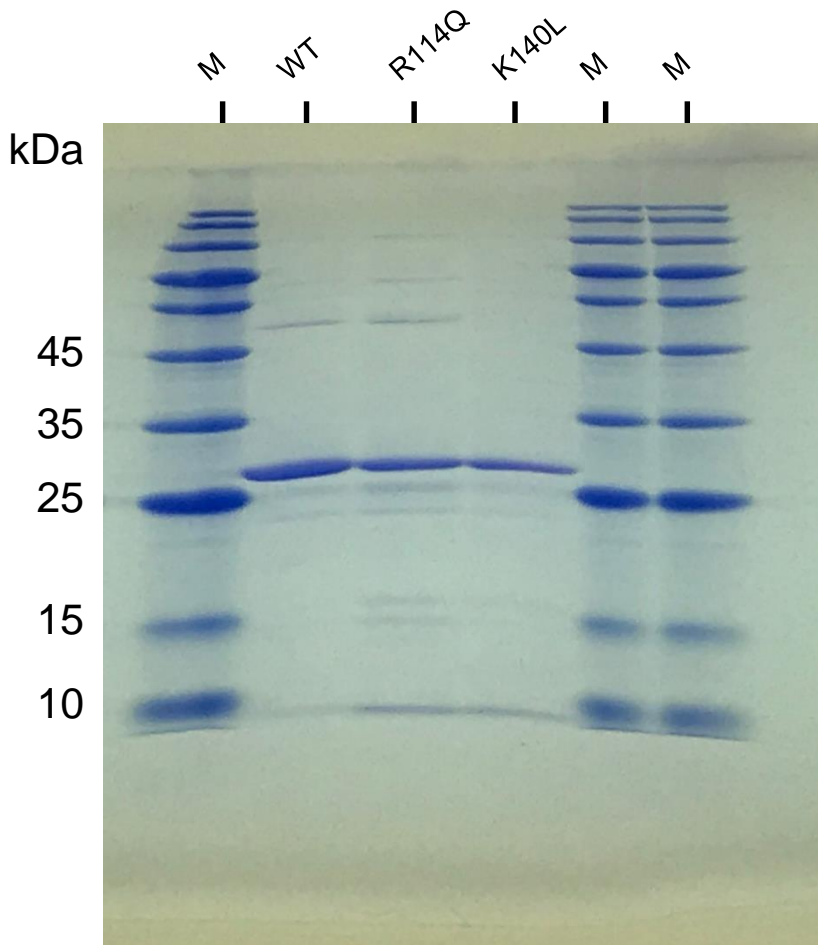

The proteins of the N-terminus (100-362aa) from wild rTRPV1 and two mutants (R114Q, L140L) were purified and analyzed by SDS-PAGE.
